1 **Oomycete small RNAs invade the plant RNA-induced silencing complex for virulence**

2

3 Florian Dunker<sup>1</sup>, Adriana Trutzenberg<sup>1</sup>, Jan Samuel Rothenpieler<sup>1</sup>, Sarah Kuhn<sup>1</sup>, Reinhard

4 Pröls<sup>2</sup>, Tom Schreiber<sup>3</sup>, Alain Tissier<sup>3</sup>, Ralph Hückelhoven<sup>2</sup> and Arne Weiberg\*<sup>1</sup>

5

6 <sup>1</sup> Faculty of Biology, Genetics, Biocenter Martinsried, LMU Munich, Großhaderner Str. 2-4,

7 82152 Martinsried, Germany

8 <sup>2</sup> Phytopathology, School of Life Sciences Weihenstephan, Technical University of Munich,

9 85354 Freising, Germany

10 <sup>3</sup> Department of Cell and Metabolic Biology, Leibniz Institute of Plant Biochemistry, 06120

11 Halle, Germany

12 \* Corresponding author (a.weiberg@lmu.de)

13 **Abstract**

14 Fungal small RNAs (sRNAs) hijack the plant RNA silencing pathway to manipulate host

15 gene expression, named cross-kingdom RNA interference (ckRNAi). It is currently unknown

16 how conserved and significant ckRNAi is for microbial virulence. Here, we found for the first

17 time that sRNAs of a pathogen representing the oomycete kingdom invade the host plant's

18 Argonaute (AGO)/RNA-induced silencing complex. To demonstrate the functionality of the

19 plant-invading oomycete *Hyaloperonospora arabidopsidis* sRNAs (*HpasRNAs*), we designed

20 a novel CRISPR endoribonuclease Csy4/GUS repressor reporter to visualize *in situ* pathogen-

21 induced target suppression in *Arabidopsis thaliana* host plant. By using 5' RACE-PCR we

22 demonstrated *HpasRNAs*-directed cleavage of plant mRNAs. The significant role of

23 *HpasRNAs* together with *AtAGO1* in virulence was demonstrated by plant *atago1* mutants

24 and by transgenic *Arabidopsis* expressing a target mimic to block *HpasRNAs*, that both

25 exhibited enhanced resistance. Individual *HpasRNA* plant targets contributed to host

26 immunity, as *Arabidopsis* gene knockout or *Hpas*RNA-resistant gene versions exhibited  
27 quantitative enhanced or reduced susceptibility, respectively. Together with previous reports,  
28 we found that ckRNAi is conserved among oomycete and fungal pathogens.

## 29 **Introduction**

30 Plant small RNAs (sRNAs) regulate gene expression via the Argonaute (AGO)/RNA-induced  
31 silencing complex (RISC), which is crucial for tissue development, stress physiology and  
32 activating immunity (Chen, 2009; Huang et al., 2016; Khraiwesh et al., 2012). The fungal  
33 plant pathogen *Botrytis cinerea*, secretes sRNAs that hijacks the plant AGO/RISC in  
34 *Arabidopsis*, and *B. cinerea* sRNAs induce host gene silencing to support virulence (Weiberg  
35 et al., 2013), a mechanism known as cross-kingdom RNA interference (ckRNAi) (Weiberg et  
36 al., 2015). In fungal-plant interactions, ckRNAi is bidirectional, as plant-originated sRNAs  
37 are secreted into fungal pathogens to trigger gene silencing of virulence genes (Cai et al.,  
38 2018; Zhang et al., 2016). It is currently not known, how important ckRNAi is for pathogen  
39 virulence in general and whether other kingdoms of microbial pathogens, such as oomycetes,  
40 transfer sRNAs into hosts to support virulence.

41 Oomycetes comprise some of the most notorious plant pathogens and belong to the eukaryotic  
42 phylum Stramenopiles, which is phylogenetically distant from animals, plants and fungi  
43 (Kamoun et al., 2015). We here demonstrate that the downy mildew causing oomycete  
44 *Hyaloperonospora arabidopsidis* transfers sRNAs into the host plant *Arabidopsis thaliana*  
45 AGO1/RISC, which are functional to silence host target genes, and that invasive oomycete  
46 sRNAs are crucial for virulence by silencing plant host defence genes.

47

## 48 **Results**

### 49 **Oomycete sRNAs invade the plant AGO1**

50 We used the oomycete *Hyaloperonospora arabidopsidis* isolate Noco2 as an inoculum that is  
51 virulent on the *A. thaliana* ecotype Col-0 (Knoth et al., 2007). We presumed that *H.*  
52 *arabidopsidis* produced sRNAs, as sRNA biogenesis core components RNA-dependent RNA  
53 polymerase and Dicer-like protein were found in the genome (Bollmann et al., 2016). In order  
54 to identify oomycete sRNAs that were expressed during infection and might be transferred  
55 into plants, we performed two types of sRNA-seq experiments. We on the one hand  
56 sequenced sRNAs isolated from total RNA extracts at 4 and 7 days post inoculation (dpi)  
57 together with mock-treated plants in order to find oomycete sRNAs expressed during  
58 infection. On the other hand, we sequenced sRNAs from *AtAGO1* immunopurification  
59 (*AtAGO1*-IP) at 3 dpi to identify invasive oomycete sRNAs. We chose *AtAGO1* for the  
60 immunopurification sequencing, given that *AtAGO1* is constitutively expressed and forms the  
61 major RISC in *Arabidopsis* (Vaucheret, 2008), and because sRNAs of fungal pathogens were  
62 previously found to be associated with *AtAGO1* during infection (Wang et al., 2016; Weiberg  
63 et al., 2013).

64 We here describe the first sRNA transcriptome of *H. arabidopsidis* infecting *Arabidopsis*. An  
65 overview of total *Arabidopsis* and *Hyaloperonospora* sRNAs read number identified in all  
66 experiments is given in Tab.S1. Reads of total *Hpas*RNAs were clustered in two major peaks  
67 of 21 nucleotides (nt) and 25 nt (Fig.1a), resembling sRNA size profiles previously reported  
68 for other plant pathogenic *Phytophthora* species (Fahlgren et al., 2013) suggesting that at least  
69 two categories of sRNAs occur in oomycetes. The identified *Hpas*RNAs mapped to distinct  
70 regions of the *H. arabidopsidis* reference genome including ribosomal RNA (rRNA), transfer  
71 RNA (tRNA), small nuclear/nucleolar RNA, protein-coding genes (mRNA) and non-  
72 annotated regions (Fig.S1a). After filtering out rRNA, tRNA and snRNA reads, *Hpas*RNAs  
73 mapping to protein-coding genes and non-annotated regions still displayed 21 nt as well as 25  
74 nt size enrichment (Fig.S1b) and 5' terminal uracil enrichment (Fig.1b).

75 We also identified *Hpas*RNA reads in the *At*AGO1-IP sRNA-seq data providing first  
76 evidence that *Hpas*RNAs translocated into plant cells and invaded the plant RISC. *At*AGO1-  
77 associated *Hpas*RNA reads highlighted 21 nt size enrichment with 5' terminal uracil  
78 preference (Fig.1c), resembling typical profile of *Arabidopsis* AGO1-bound sRNAs (Fig.  
79 S1c) (Mi et al., 2008). This suggests that *Hpas*RNAs were loaded into *At*AGO1. The ratio of  
80 *At*AGO1-bound *Hpas*RNAs to total *Hpas*RNAs was 1:78, whereas the ratio of the 21 nt  
81 *Hpas*RNA fractions was 1:18 supporting that 21 nt *Hpas*RNAs were preferably transferred  
82 into plant *At*AGO1. We suspected that such 21 nt *Hpas*RNAs might have the potential to  
83 silence plant genes. Indeed, we identified 133 unique *Hpas*RNA reads that were present in all  
84 infected total sRNA and *At*AGO1-IP sRNA datasets with read counts > 5 reads per million in  
85 at least one dataset, among which 34 were predicted to target at least one *A. thaliana* cDNA  
86 with stringent cut-off criteria (Tab.S2).

### 87 ***Hpas*RNAs induce host target silencing in infected plant cells**

88 To examine if *At*AGO1-bound *Hpas*RNAs could induce gene silencing in plants, we  
89 generated a novel *in situ* silencing reporter construct for *Hpas*RNA-induced gene silencing.  
90 This reporter is based on the CRISPR endonuclease Csy4 that specifically binds and cleaves a  
91 short sequence motif (Haurwitz et al., 2010). This motif was fused to a *GUS* gene to mark it  
92 for degradation (Fig.1d). We cloned native plant target sequences of *Hpas*RNAs as flanking  
93 tags next to the Csy4 to turn it into a target of *Hpas*RNAs and to examine their potential of  
94 silencing the predicted plant targets. The GUS reporter was expected to become active if  
95 *Hpas*RNAs would silence Csy4. For this examination, we chose as invading sRNA candidates  
96 *Hpas*RNA2 and *Hpas*RNA90 that were predicted to target *Arabidopsis AtWNK2* and *AtAED3*  
97 (Tab.S2). We chose these *Hpas*RNA targets, because *AtWNK2* and *AtAED3* mRNAs were  
98 previously reported to accumulate less upon virulent *H. arabidopsidis* infection when  
99 compared to infection with an avirulent *H. arabidopsidis* strain by RNA-seq (Asai et al.,  
100 2014) supporting a potential virulence-triggered gene suppression. Both, *Hpas*RNA2 and

101 *HpasRNA90* were confirmed to accumulate in infected plants at 4 and 7 dpi (Fig.S2). As  
102 promoter for *Csy4*, we cloned a 2 kb-DNA fragment upstream of the start codon of one of the  
103 two target genes (here *proAtWNK2*) to simulate native target mRNA levels. To exclude  
104 *HpasRNA2/HpasRNA90*-unspecific suppression of *Csy4* or ckRNAi-independent effects that  
105 would activate GUS, we cloned scrambled target sequences of *HpasRNA2* and *HpasRNA90*  
106 as well as the target sequence of *AtmicroRNA164* from its endogenous target *AtCUC2*, as  
107 negative controls. We tested at least three individual T1 lines per reporter construct. *Csy4*  
108 blocked GUS activity in non-colonized cells (Fig.1e) proving functionality of the reporter  
109 repression. Upon infection, plants expressing *Csy4* transcripts fused to *HpasRNA2* and  
110 *HpasRNA90* target sequences highlighted GUS activation along the *H. arabidopsidis* hyphal  
111 infection front (Fig.1e). This experiment provides, to our knowledge, the first *in situ*  
112 visualization of a pathogen's sRNA translocation and function in infected host cells to trigger  
113 ckRNAi. GUS activation appeared only around the hyphae indicating that ckRNAi did not  
114 spread further into distal regions away from the primary infection. In contrast, *Csy4* linked to  
115 scrambled *HpasRNA2/HpasRNA90* target sequences or *AtmiRNA164* target sequence did  
116 not typically express GUS activation around the infecting hyphae, excluding any target  
117 sequence-unspecific regulation of *Csy4* or GUS, as well as pathogen-triggered regulation of  
118 the *AtWNK2* promoter (Fig.1e, Fig.S3).

119 As we revealed *HpasRNA* invasion into the plant *AtAGO1*-RISC during infection and found  
120 infection-site specific target silencing triggered by *HpasRNA2* or *HpasRNA90*, we attempted  
121 to clarify if *HpasRNA2* and *HpasRNA90* mediate gene silencing of its predicted plant targets  
122 for virulence. To test this, we performed quantitative reverse transcriptase (qRT)-PCR of  
123 *AtWNK2* and *AtAED3* on whole seedling leaves of wild type (WT) plants upon *H.*  
124 *arabidopsidis* infection and included the *atago1-27* mutant allele as a control, where target  
125 suppression should fail. Indeed, *AtAED3* was significantly down-regulated upon *H.*  
126 *arabidopsidis* inoculation at 7 dpi and *AtWNK2* expression indicated moderate suppression at

127 4 dpi (Fig.S4a) in WT, when compared to mock-treated samples. Because the down-  
128 regulation effects were moderate, we validated the results by a second independent *H.*  
129 *arabidopsidis* inoculation experiment (Fig.S4b). In support of *Hpas*RNA-induced target  
130 silencing through *AtAGO1*, suppression of *AtWNK2* and *AtAED3*, as observed in WT was  
131 abolished in the *atago1-27* background (Fig.S4). However, *AtAED3* expression data also  
132 indicated slight down-regulation upon mock treatment compared to before infection, as well  
133 as higher transcript levels in *atago1-27* before infection when compared to WT.  
134 As *Arabidopsis* target transcripts were found to be down-regulated upon *H. arabidopsidis*  
135 infection, we examined, if *Hpas*RNAs guided slicing of *AtWNK2* and *AtAED3* via the host  
136 *AtAGO1*-RISC. *AtAGO1* possesses RNA cleavage activity on microRNA-guided target genes  
137 precisely at position 10/11 of the 5' end microRNA/mRNA duplex (Mallory and Bouché,  
138 2008). We performed 5' random amplification of cDNA-ends (RACE)-PCR analysis to reveal  
139 5' ends of target transcript fragments. We expected cleavage in *Hyaloperonospora*-infected  
140 WT plants but no cleavage products when using non-infected *Arabidopsis* or infected  
141 *Arabidopsis* expressing an *Hpas*RNA-resistant version of *AtAED3r* or *AtWNK2r* (Fig.S5a).  
142 Indeed, using *Arabidopsis* WT resulted in PCR products of the expected cleavage size for  
143 both target genes (Fig.1f). While a clear band of the expected size was detected for *AtAED3*,  
144 two PCR bands were detected for *AtWNK2* at the expected size region in infected WT plant  
145 samples (Fig.1f). *AtWNK2* is predicted to have up to six splicing variants that would render  
146 RACE-PCR analysis being challenging and might explain for the two PCR bands. We found  
147 evidence for target mRNA cleavage at the predicted *Hpas*RNA target sequence for both target  
148 genes by sequencing the isolated PCR products (Fig.1g). Cleavage was obtained slightly  
149 shifted from the predicted *AtAGO1* slicing position, namely at positions 8/9 opposite to 5'  
150 *Hpas*RNA90 and 10/11 and 11/12 to 5' *Hpas*RNA2. Indeed, we found alternative  
151 *Hpas*RNA90 and *Hpas*RNA2 species in our sRNA sequence libraries, which could explain  
152 the detected cleavage products as *AtAGO1*-mediated. On the contrary, no PCR products of

153 the expected size were obtained in uninfected plants and mutants with resistant target version  
154 of *AtWNK2* and in uninfected plants for *AtAED3*, whereas *AtAED3* resistant target version  
155 showed two bands slightly lower of the expected size (Fig.1g). Sequencing of cloned  
156 “nearby-expected size” PCR products in the *AtAED3* target resistant version revealed mRNA  
157 ends exclusively outside the predicted *HpasRNA* target sequence (Fig.S5b).

### 158 ***Arabidopsis atago1* exhibited enhanced disease resistance against downy mildew**

159 Over hundred *HpasRNAs* invaded the plant AGO1/RISC during infection, with 34  
160 *HpasRNAs* being predicted to silence 49 plant targets including stress-related genes (Tab.S2).  
161 *HpasRNAs* induced target host gene silencing at the infection site (Fig.1e). Based on these  
162 observations, we hypothesized that *AtAGO1* was crucial for *HpasRNAs* to suppress  
163 resistance. To test this hypothesis, we compared the disease outcome of *atago1-27* with WT  
164 plants by staining infected leaves with Trypan Blue. The hypomorphic *atago1-27* mutant  
165 represents relatively mild phenotypes compared to other *atago1* mutant alleles (Morel et al.,  
166 2002), enabling to perform infection assays. The *atago1-27* mutant exhibited a remarkable  
167 phenotype revealing dark stained host cells around hyphae, what we interpreted as trailing  
168 necrosis of plant cells (Fig.2a), a phenotype frequently observed in sub-compatible  
169 interactions (Coates and Beynon, 2010). This phenotype co-occurred with enhanced disease  
170 resistance, because *H. arabidopsidis* DNA content was strongly reduced (Fig.2b) and number  
171 of *H. arabidopsidis* conidiospores was significantly lower in *atago1-27* (Fig.2c). Pathogen  
172 DNA content was also reduced in *atago1-27* cotyledons (Fig.S6a) but without observing  
173 trailing necrosis (Fig.S6b), as previously described in sub-compatible combinations of *H.*  
174 *arabidopsidis* pathotypes and *A. thaliana* ecotypes (McDowell et al., 2005). The disease  
175 phenotype was indeed linked to *atago1* mutations and not to any secondary background  
176 mutation, as independent mutant alleles *atago1-45* and *atago1-46* also displayed, albeit to a  
177 smaller extent, trailing necrosis after inoculation with *H. arabidopsidis* (Fig.S6c). On the  
178 contrary, *atago2-1* and *atago4-2* did neither exhibit trailing necrosis nor reduced oomycete

179 biomass (Fig.S6d,e). *HpasRNA2* and *HpasRNA90* were confirmed to load into *AtAGO1* but  
180 not into *AtAGO2* by AGO-IP coupled to stem-loop RT-PCR (Fig.S7), which is consistent  
181 with the observed reduced disease level in *atago1* mutants but not in *atago2-1*, suggesting  
182 that invasive *HpasRNAs* may act mainly through *AtAGO1* to support virulence.

183 The above results could have been also caused by debilitated plant endogenous sRNAs as  
184 *atago1* as well as other microRNA pathway mutants, such as *atdicer-like(dcl)1*, *athua*  
185 *enhancer(hen)1* *athasty(hst)* or *atserrate(se)*, express developmental defects (Li and Zhang,  
186 2016), which could have caused enhanced disease resistance against *H. arabidopsidis* (Fig.2a-  
187 c). To rule out this possibility, we inoculated *atdcl1-11* with *H. arabidopsidis*. We did not  
188 detect any trailing necrosis, reduced pathogen biomass, but even a significantly increased  
189 number of conidiospores in *atdcl1-11* (Fig.2d-f) indicating a positive role of *A. thaliana*  
190 microRNAs in immune response against *H. arabidopsidis*. These observations proved that  
191 necrotic trailing and reduced pathogen susceptibility found in *atago1* was not due to the loss  
192 of functional endogenous plant microRNA pathway. In support, *atse-2*, *athen1-5* and *athst-6*  
193 did also not show necrotic trailing upon infection (Fig.S8a,b).

194 Since *atago1* expressed trailing necrosis and reduced susceptibility to *H. arabidopsidis*, we  
195 wanted to rule out that common immunity or activation of *Resistance (R)* genes caused  
196 enhanced resistance in *atago1-27* compared to WT. We profiled gene expression of the  
197 *A. thaliana* immunity marker *AtPathogenesis-Related (PR)1*. Induction of *AtPR1* was neither  
198 faster nor stronger at 6, 12 or 18 hours post inoculation in *atago1-27* compared to WT  
199 (Fig.S9a). Expression of *AtPR1* and another immunity marker *AtPlant-Defensin (PDF)1.2*  
200 were not higher compared to WT before or after infection in *atago1-27* at 1, 4 or 7 dpi  
201 (Fig.S9b,c).

202 Plant microRNAs/*AtAGO1* are known to initiate the production of secondary phased siRNAs  
203 (phasiRNAs), which negatively control the expression of *NLR (Nucleotide-binding domain*  
204 *Leucine-rich Repeat)* class *R* genes (Li et al., 2012). The lack of phasiRNAs could in theory



205 result in enhanced expression of *NLRs* and lead to higher resistance against *H. arabidopsidis*.  
206 PhasiRNA production depends on the *AtRNA*-dependent RNA polymerase (RDR)6 and  
207 *AtDCL2/AtDCL3/AtDCL4* (Komiya, 2017). To rule out *R* gene-based enhanced resistance  
208 due to lack of phasiRNAs, we inoculated *atrdr6-15* and *atdcl2dcl3dcl4* mutants with *H.*  
209 *arabidopsidis* Noco2. Both mutants did not exhibit either trailing necrosis (Fig.2g) or reduced  
210 pathogen biomass (Fig.2h) upon inoculation with *H. arabidopsidis*.

211 In order to investigate whether *atago1-27* is more resistant to another biotrophic pathogen, we  
212 performed infection assays with the powdery mildew fungus *Erysiphe cruciferarum*. We did  
213 neither observe plant cell necrosis, nor a reduction in pathogen biomass compared to WT  
214 (Fig.S10a,b). These data confirmed that the observed resistance in *atago1* against  
215 *Hyaloperonospora* is not based on generally enhanced immunity or on *R* gene-mediated  
216 resistance.

### 217 **Invasive *Hyaloperonospora* sRNAs are crucial for virulence**

218 As *Arabidopsis atago1* mutants displayed reduced susceptibility towards *H. arabidopsidis*  
219 infection and since *HpasRNAs* were invading the host *AtAGO1*-RISC to silence plant target  
220 genes, we investigated how important *HpasRNAs* were for virulence. To assess the  
221 importance of *HpasRNAs* for virulence, we cloned and expressed a triple short tandem target  
222 mimic (STTM) in *Arabidopsis* to collectively scavenge three *HpasRNAs*: *HpasRNA2*,  
223 *HpasRNA30* and *HpasRNA90* (Fig.3a, Tab.S2). We included *HpasRNA30* in the STTM,  
224 because it was predicted to target a homolog of *AtWNK2*, namely *AtWNK5*, and so we  
225 assumed that *HpasRNA30/AtWNK5* might also be important for virulence. *HpasRNA30* was  
226 detectable in infected plant leaves at 4 and 7 dpi by stem-loop RT-PCR, but not at 0 and 1 dpi  
227 supporting that this sRNA was produced by *H. arabidopsidis* but not by *Arabidopsis*  
228 (Fig.S2a). Remarkably, seven out of eleven individual STTM T1 transgenic lines resembled  
229 partially the trailing necrosis phenotype also found in *atago1* (Fig.3b). We isolated two stable  
230 STTM T2 lines (#4, #5). The STTM #4 line showed target de-repression of *AtAED3* at 7 dpi

231 and *AtWNK2* at 4 dpi when compared to plants expressing an empty vector control upon *H.*  
232 *arabidopsidis* inoculation (Fig.S11a). These time points corresponded to target gene  
233 suppression upon *H. arabidopsidis* inoculation, as found by qRT-PCR analysis (Fig. S4).  
234 Both STTM T2 lines exhibited reduced pathogen biomass (Fig.S11b) and allowed  
235 significantly lower production of pathogen conidiospores (Fig.3c). These results demonstrated  
236 that *HpasRNAs* are important for virulence.

### 237 ***Arabidopsis* target genes of *Hyaloperonospora* sRNAs contribute to plant defence**

238 To examine the contribution of individual target genes to plant defence, we isolated three T-  
239 DNA insertion lines, *atwnk2-2*, *atwnk2-3*, and *ataed3-1* (Fig.S12a), for inoculation with *H.*  
240 *arabidopsidis*. We located the T-DNA insertion in *atwnk2-3* from the last exon into the 3´  
241 UTR based on sequencing of the T-DNA flanking site (Fig.S12a). Trypan Blue staining of  
242 infected leaves indicated WT-like infection structures in all T-DNA insertion lines. However,  
243 the number of haustoria at the conidiospore germination tube was significantly increased in  
244 *atwnk2-2* (Fig.S12b). The pathogen DNA content was slightly but not significantly enhanced  
245 in *atwnk2-2* and *ataed3-1* compared to WT, but not in *atwnk2-3* (Fig.4a). Significantly  
246 increased number of conidiospores (Fig.4b) and sporangiophores (Fig.4c) was found in all  
247 tested mutant lines upon *H. arabidopsidis* infection.

248 To continue the investigation on the contribution of individual target genes to plant defence,  
249 we expressed native promoter-driven (*proAtAED3*, *proAtWNK2*) targets *AtAED3* and  
250 *AtWNK2* or a target gene-resistant version, *AtAED3r* and *AtWNK2r* (Fig.S5a), in the  
251 respective mutant background *ataed3-1* and *atwnk2-2*. The integration of both *AtWNK2* and  
252 *AtWNK2r* complemented the previously described early flowering phenotype of *atwnk2-2*  
253 (Wang et al., 2008) confirming that complementation of *AtWNK2* was successful (Fig. S13).  
254 We expected those plant lines to become more resistant against *H. arabidopsidis*. Indeed,  
255 both, the native gene version and the target site resistant version, exhibited reduced number of  
256 conidiospores compared to T-DNA mutant plants carrying an empty expression vector,

257 respectively (Fig.4d). To further explore the role of target genes in plant immunity, we  
258 attempted to generate overexpression lines of resistant target gene versions and achieved an  
259 overexpressor of the *AtWNK2r* version (*AtWNK2r*-OE) (Fig.S5a) in the *atwnk2-2* background.  
260 *AtWNK2r*-OE plants showed ectopic cell death in distance from infection sites (Fig.S14a), as  
261 previously described for overexpression lines of other immunity factors, such as *AtBAK1*  
262 (Domínguez-Ferreras et al., 2015). Moreover, infection structures frequently displayed  
263 aberrant swelling-like structures and extensive branching of hyphae instead of the regular  
264 pyriform haustoria formed in *atwnk-2-2* (Fig.S14b), further supporting a role for *AtWNK2* in  
265 immune reaction.

## 266 **Discussion**

267 Our study demonstrates the invasion, function, and significance of *Hyaloperonospora* sRNAs  
268 in virulence, the first natural ckRNAi case ever reported for an oomycete plant pathogen. By  
269 *Arabidopsis* *AtAGO1*-IP coupled to sRNA-seq, we identified 34 *H. arabidopsidis* sRNAs that  
270 hijacked the host RNAi machinery to target multiple plant genes for silencing. These deep  
271 sequencing data offers first insights into the invasive *H. arabidopsidis* sRNA transcriptome  
272 during host infection.

273 By using a novel *Csy4*/*GUS* repressor reporter, oomycete sRNA-induced functional target  
274 gene silencing was demonstrated *in situ* and revealed effective silencing alongside the  
275 *Hyaloperonospora* hyphae. Compared to plant sRNAs, a relatively small proportion of  
276 *Hpas*RNAs was counted in the *AtAGO1* sRNA-seq experiment (1:2400), because most  
277 *AtAGO1* molecules were purified from non-colonized tissue and *Hpas*RNA-induced target  
278 silencing was only detected in *Arabidopsis* cells in close proximity to the pathogen hyphae.  
279 We suggest to not *pro forma* exclude sRNAs exhibiting low read number from ckRNAi  
280 studies, as other studies revealed strong phenotypic effects despite small RNA reads in the  
281 range of ten per million or lower (Jahan et al., 2015; Qutob et al., 2013). *AtAGO1* was a  
282 major RISC that was hijacked by *Hpas*RNAs to success infection, because both blocking

283 *Hpas*RNAs by transgenic target mimics and dysfunctional *atago1* mutant alleles displayed a  
284 clear disease resistance phenotype. We investigated two examples of *Hpas*RNA target genes,  
285 *AtWNK2* and *AtAED3*, and confirmed mRNAs were down-regulated upon infection and  
286 cleaved at the predicted *Hpas*RNA target sequences. Target genes suppression was moderate,  
287 as expected, since RNA was purified from whole leaves with most cells being from non-  
288 infected leaf lamina. This was confirmed by the results of the Csy4/GUS repressor reporter,  
289 that demonstrated that target silencing occurred only in the *Arabidopsis* cells in close  
290 proximity to the *Hyaloperonospora* hyphae and haustoria (Fig.1e).

291 Plant invasive *Hpas*RNAs are crucial for successful infection, because transgenic *Arabidopsis*  
292 that block function of three examples *Hpas*RNA2, *Hpas*RNA30 and *Hpas*RNA90 via target  
293 mimics diminished virulence. As we identified 113 invasive *Hyaloperonospora* sRNAs with  
294 49 predicted plant target genes, we suggest that many *Hpas*RNAs collaboratively sabotage  
295 expressional activation of plant immune response, as previously shown for proteinaceous  
296 pathogen effectors (Cunnac et al., 2011). Interestingly, we found that the *Hpas*RNA2 sequence  
297 was conserved among plant pathogenic oomycete species of the genera *Hyaloperonospora*,  
298 *Phytophthora* and *Pythium* (Fig.S15a). Target sequences within plant *WNK2* homologs were  
299 conserved as well, with the lowest number of base pair mismatches occurring in the highly-  
300 adapted *A. thaliana*/*H. arabidopsidis* interaction (Fig.S15b), reflecting the most co-adapted  
301 plant-oomycete interaction. It will be exciting to see how sRNAs of other oomycete  
302 pathogens contribute to host infection.

303 Regarding the role of identified *Hpas*RNAs target genes in host defence, our data supported  
304 quantitative contributions of *AtAED3* and *AtWNK2* to plant immunity. *AtAED3* encodes a  
305 putative apoplastic aspartyl protease and has been suggested to be involved in systemic  
306 immunity (Breitenbach et al., 2014). *AtWNK2* contributes to flowering time regulation in  
307 *A. thaliana*, while other members of the plant WNK family have been linked to the abiotic  
308 stress response (Cao-Pham et al., 2018). What is the particular function of these target genes

309 against *H. arabidopsidis* infection and whether these also play a role against other pathogens,  
310 needs to be investigated.

311 With this new data, we demonstrate that ckRNAi is a conserved virulence mechanism among  
312 distinct classes of pathogens, as fungi deliver sRNAs into host AGO as well to target host  
313 genes (Weiberg et al., 2013), and ckRNAi should be considered in virtually all host-pathogen  
314 interactions.

315

### 316 **Author contributions**

317 Research concept and design A.W.; experimental design: F.D., and A.W.; experiments  
318 performed F.D, A.T., J.S.R., S. K., R.P.; bioinformatics analysis: A.W. and F.D.; contribution  
319 of the Csy4-based de-repression system: T.S. and A.T.; manuscript writing: A.W. and F.D.;  
320 manuscript reviewing and editing: F.D., R.H., and A.W.

321

### 322 **Acknowledgements**

323 The authors thank Michaela Pagliara for excellent technical assistance, Dr. Martin Parniske  
324 for critical reading of the manuscript and inspiring scientific discussions and support, and Dr.  
325 Aline Banhara and Fang-Yu Hwu for introducing us into the *Hyaloperonospora/Arabidopsis*  
326 pathosystem and the Gene Center Munich for Illumina sequencing service. Seeds used in this  
327 study were provided by the Nottingham *Arabidopsis* Stock Centre (NASC) unless otherwise  
328 specified. We thank Dr. Hervé Vaucheret, Dr. James Carrington, Dr. Steven Jacobsen, and for  
329 kindly providing us seeds of the *atago1-27*, *atdcl2dcl3dcl4*, *atrdr6-15*, *atse-2* mutants and Dr.  
330 Tino Köster for the *atdcl1-11* mutant. We thank Dr. Michael Boshart for providing us  $\alpha$ HA  
331 (12CA5) antibody. We thank Dr. David Chiasson and Martin Bircheneder for providing  
332 Golden Gate entry plasmids. This work was supported by the German Research Foundation  
333 (DFG; Grant-ID WE 5707/1-1). The funders had no role in study design, data collection and  
334 analysis, and decision to publish or in preparation of the manuscript.

335

336 **References**

- 337 Asai, S., Rallapalli, G., Piquerez, S.J.M., Caillaud, M.-C., Furzer, O.J., Ishaque, N.,  
338 Wirthmueller, L., Fabro, G., Shirasu, K., Jones, J.D.G., 2014. Expression profiling  
339 during *Arabidopsis*/downy mildew interaction reveals a highly-expressed effector that  
340 attenuates responses to salicylic acid. *PLoS Pathog.* 10, e1004443.
- 341 Bollmann, S.R., Fang, Y., Press, C.M., Tyler, B.M., Grünwald, N.J., 2016. Diverse  
342 evolutionary trajectories for small RNA biogenesis genes in the oomycete genus  
343 *Phytophthora*. *Front. Plant Sci.* 7.
- 344 Breitenbach, H.H., Wenig, M., Wittek, F., Jordá, L., Maldonado-Alconada, A.M., Sarioglu,  
345 H., Colby, T., Knappe, C., Bichlmeier, M., Pabst, E., Mackey, D., Parker, J.E., Vlot,  
346 A.C., 2014. Contrasting roles of the apoplastic aspartyl protease APOPLASTIC,  
347 ENHANCED DISEASE SUSCEPTIBILITY1-DEPENDENT1 and LEGUME  
348 LECTIN-LIKE PROTEIN1 in *Arabidopsis* systemic acquired resistance. *Plant*  
349 *Physiol.* 165, 791–809.
- 350 Cai, Q., Qiao, L., Wang, M., He, B., Lin, F.-M., Palmquist, J., Huang, S.-D., Jin, H., 2018.  
351 Plants send small RNAs in extracellular vesicles to fungal pathogen to silence  
352 virulence genes. *Science* 360, 1126–1129.
- 353 Cao-Pham, A.H., Urano, D., Ross-Elliott, T.J., Jones, A.M., 2018. Nudge-nudge, WNK-  
354 WNK (kinases), say no more? *New Phytol.* 220, 35–48.
- 355 Chen, X., 2009. Small RNAs and their roles in plant development. *Annu. Rev. Cell Dev. Biol.*  
356 25, 21–44.
- 357 Coates, M.E., Beynon, J.L., 2010. *Hyaloperonospora arabidopsidis* as a pathogen model.  
358 *Annu. Rev. Phytopathol.* 48, 329–345.
- 359 Cunnac, S., Chakravarthy, S., Kvitko, B.H., Russell, A.B., Martin, G.B., Collmer, A., 2011.  
360 Genetic disassembly and combinatorial reassembly identify a minimal functional

- 361 repertoire of type III effectors in *Pseudomonas syringae*. *Proc. Natl. Acad. Sci.* 108,  
362 2975–2980.
- 363 Domínguez-Ferreras, A., Kiss-Papp, M., Jehle, A.K., Felix, G., Chinchilla, D., 2015. An  
364 overdose of the *Arabidopsis* coreceptor BRASSINOSTEROID INSENSITIVE1-  
365 ASSOCIATED RECEPTOR KINASE1 or its ectodomain causes autoimmunity in a  
366 SUPPRESSOR OF BIR1-1-dependent manner. *Plant Physiol.* 168, 1106–1121.
- 367 Fahlgren, N., Bollmann, S.R., Kasschau, K.D., Cuperus, J.T., Press, C.M., Sullivan, C.M.,  
368 Chapman, E.J., Hoyer, J.S., Gilbert, K.B., Grünwald, N.J., Carrington, J.C., 2013.  
369 *Phytophthora* have distinct endogenous small RNA populations that include short  
370 interfering and microRNAs. *PLoS ONE* 8, e77181.
- 371 Haurwitz, R.E., Jinek, M., Wiedenheft, B., Zhou, K., Doudna, J.A., 2010. Sequence- and  
372 structure-specific RNA processing by a CRISPR endonuclease. *Science* 329, 1355–  
373 1358.
- 374 Henderson, I.R., Zhang, X., Lu, C., Johnson, L., Meyers, B.C., Green, P.J., Jacobsen, S.E.,  
375 2006. Dissecting *Arabidopsis thaliana* DICER function in small RNA processing,  
376 gene silencing and DNA methylation patterning. *Nat. Genet.* 38, 721–725.
- 377 Huang, J., Yang, M., Zhang, X., 2016. The function of small RNAs in plant biotic stress  
378 response. *J. Integr. Plant Biol.* 58, 312–327.
- 379 Jahan, S.N., Åsman, A.K.M., Corcoran, P., Fogelqvist, J., Vetukuri, R.R., Dixelius, C., 2015.  
380 Plant-mediated gene silencing restricts growth of the potato late blight pathogen  
381 *Phytophthora infestans*. *J. Exp. Bot.* 66, 2785–2794.
- 382 Kamoun, S., Furzer, O., Jones, J.D.G., Judelson, H.S., Ali, G.S., Dalio, R.J.D., Roy, S.G.,  
383 Schena, L., Zambounis, A., Panabières, F., Cahill, D., Ruocco, M., Figueiredo, A.,  
384 Chen, X.-R., Hulvey, J., Stam, R., Lamour, K., Gijzen, M., Tyler, B.M., Grünwald,  
385 N.J., Mukhtar, M.S., Tomé, D.F.A., Tör, M., Van Den Ackerveken, G., McDowell, J.,  
386 Daayf, F., Fry, W.E., Lindqvist-Kreuze, H., Meijer, H.J.G., Petre, B., Ristaino, J.,

- 387 Yoshida, K., Birch, P.R.J., Govers, F., 2015. The Top 10 oomycete pathogens in  
388 molecular plant pathology. *Mol. Plant Pathol.* 16, 413–434.
- 389 Khraiwesh, B., Zhu, J.-K., Zhu, J., 2012. Role of miRNAs and siRNAs in biotic and abiotic  
390 stress responses of plants. *Biochim. Biophys. Acta BBA - Gene Regul. Mech.* 1819,  
391 137–148.
- 392 Knoth, C., Ringler, J., Dangl, J.L., Eulgem, T., 2007. *Arabidopsis* WRKY70 is required for  
393 full RPP4-mediated disease resistance and basal defense against *Hyaloperonospora*  
394 *parasitica*. *Mol. Plant. Microbe Interact.* 20, 120–128.
- 395 Komiya, R., 2017. Biogenesis of diverse plant phasiRNAs involves a miRNA-trigger and  
396 Dicer-processing. *J. Plant Res.* 130, 17–23.
- 397 Li, C., Zhang, B., 2016. MicroRNAs in control of plant development. *J. Cell. Physiol.* 231,  
398 303–313.
- 399 Li, F., Pignatta, D., Bendix, C., Brunkard, J.O., Cohn, M.M., Tung, J., Sun, H., Kumar, P.,  
400 Baker, B., 2012. MicroRNA regulation of plant innate immune receptors. *Proc. Natl.*  
401 *Acad. Sci.* 109, 1790–1795.
- 402 Mallory, A.C., Bouché, N., 2008. MicroRNA-directed regulation: to cleave or not to cleave.  
403 *Trends Plant Sci.* 13, 359–367.
- 404 McDowell, J.M., Williams, S.G., Funderburg, N.T., Eulgem, T., Dangl, J.L., 2005. Genetic  
405 analysis of developmentally regulated resistance to downy mildew  
406 (*Hyaloperonospora parasitica*) in *Arabidopsis thaliana*. *Mol. Plant. Microbe Interact.*  
407 18, 1226–1234.
- 408 Mi, S., Cai, T., Hu, Y., Chen, Y., Hodges, E., Ni, F., Wu, L., Li, S., Zhou, H., Long, C., Chen,  
409 S., Hannon, G.J., Qi, Y., 2008. Sorting of small RNAs into *Arabidopsis* Argonaute  
410 complexes is directed by the 5' terminal nucleotide. *Cell* 133, 116–127.



- 411 Morel, J.-B., Godon, C., Mourrain, P., Béclin, C., Boutet, S., Feuerbach, F., Proux, F.,  
412 Vaucheret, H., 2002. Fertile hypomorphic *ARGONAUTE* (*ago1*) mutants impaired in  
413 post-transcriptional gene silencing and virus resistance. *Plant Cell* 14, 629–639.
- 414 Qutob, D., Patrick Chapman, B., Gijzen, M., 2013. Transgenerational gene silencing causes  
415 gain of virulence in a plant pathogen. *Nat. Commun.* 4, 1349.
- 416 Vaucheret, H., 2008. Plant ARGONAUTES. *Trends Plant Sci.* 13, 350–358.
- 417 Wang, M., Weiberg, A., Lin, F.-M., Thomma, B.P.H.J., Huang, H.-D., Jin, H., 2016.  
418 Bidirectional cross-kingdom RNAi and fungal uptake of external RNAs confer plant  
419 protection. *Nat. Plants* 2, 16151.
- 420 Wang, Y., Liu, K., Liao, H., Zhuang, C., Ma, H., Yan, X., 2008. The plant *WNK* gene family  
421 and regulation of flowering time in *Arabidopsis*. *Plant Biol.* 10, 548–562.
- 422 Weiberg, A., Bellinger, M., Jin, H., 2015. Conversations between kingdoms: small RNAs.  
423 *Curr. Opin. Biotechnol.* 32, 207–215.
- 424 Weiberg, A., Wang, M., Lin, F.-M., Zhao, H., Zhang, Z., Kaloshian, I., Huang, H.-D., Jin, H.,  
425 2013. Fungal small RNAs suppress plant immunity by hijacking host RNA  
426 interference pathways. *Science* 342, 118–123.
- 427 Yi, H., Richards, E.J., 2007. A cluster of disease resistance genes in *Arabidopsis* is  
428 coordinately regulated by transcriptional activation and RNA silencing. *Plant Cell* 19,  
429 2929–2939.
- 430 Zhang, T., Zhao, Y.-L., Zhao, J.-H., Wang, S., Jin, Y., Chen, Z.-Q., Fang, Y.-Y., Hua, C.-L.,  
431 Ding, S.-W., Guo, H.-S., 2016. Cotton plants export microRNAs to inhibit virulence  
432 gene expression in a fungal pathogen. *Nat. Plants* 2, 16153.

433

#### 434 **Figure legends**

435 Figure 1: *Hpas*RNAs invade the plant AGO1 and induce host target silencing in infected plant  
436 cells. a) Size profile of *Hpas*RNAs revealed two size peaks at 21 nt and 25 nt at 4 and 7 dpi.

437 b) The frequency of the first nucleotide at 5' positions of *Hpas*RNAs mapping to cDNAs or  
438 non-annotated regions revealed bias towards uracil. c) Size distribution and first nucleotide  
439 analysis of *AtAGO1*-associated *Hpas*RNAs showed size preference at 21 nt with 5' terminal  
440 uracil. d) A novel Csy4/GUS reporter construct was assembled to detect *Hpas*RNA-directed  
441 gene silencing, reporting GUS activity if *Hpas*RNAs were active to suppress Csy4 expression  
442 by sequence-specificity. e) GUS staining of infected leaves at two magnifications revealed  
443 sequence-specific reporter silencing at 4 dpi. Csy4 with *Hpas*RNA2 and *Hpas*RNA90 target  
444 sequence (ts) is depicted on the top and with scrambled ts on the bottom. Red arrows indicate  
445 *Hyaloperonospora* hyphae in the higher magnification images. Scale bars indicate 50  $\mu$ m. f)  
446 5' RACE-PCR revealed amplification products at the expected size of target cleavage of  
447 *Hpas*RNAs in infected WT plants, as indicated by arrows. Two PCR bands were detected for  
448 *AtWNK2* cleavage. No cleavage products corresponding to *Hpas*RNAs were visible in non-  
449 infected WT plants for *AtAED3* and *AtWNK2* and for the resistant target version of *AtWNK2*.  
450 g) Sequencing of 5' RACE-PCR products from infected WT plants revealed plant mRNA  
451 cleavage products at the *Hpas*RNA target sequences, as indicated by red arrowheads.

452

453 Figure 2: *Arabidopsis atago1* exhibited enhanced disease resistance against *H. arabidopsidis*.

454 a) Trypan Blue-stained microscopy images showed trailing necrosis around hyphae in *atago1*-  
455 27, but no necrosis on WT seedling leaves at 7 dpi. b) *H. arabidopsidis* genomic DNA was  
456 quantified in *atago1-27* and WT plants by qPCR at 4 dpi relative to plant genomic DNA  
457 represented by  $n \geq$  four biological replicates. Asterisk indicates statistically significant  
458 difference by one tailed Student's test with  $p \leq 0.05$ . c) Numbers of conidiospores per gram  
459 leaf fresh weight (FW) in *atago1-27* and WT plants at 7 dpi are represented by four biological  
460 replicates. The asterisk indicates significant difference by one tailed Student's t-test with  $p \leq$   
461 0.05. d) Trypan Blue-stained microscopy images of *atdcl1-11* did not show any trailing  
462 necrosis at 7 dpi. e) *H. arabidopsidis* genomic DNA in *atdcl1-11* and WT plants at 4 dpi were

463 in tendency enhanced with  $n \geq$  four biological replicates. f) Number of conidiospores per  
464 gram leaf fresh weight (FW) in *atdcl1-11* at 7 dpi was significantly elevated compared to WT  
465 plants. g) Trypan Blue-stained microscopy images of *atrdr6-15* and *atdcl2dcl3dcl4* showed  
466 no necrosis after inoculation with *H. arabidopsidis* at 7 dpi. h) *H. arabidopsidis* genomic  
467 DNA content in leaves was elevated in *atrdr6-15* and *atdcl2dcl3dcl4* compared to WT at 4  
468 dpi with  $n \geq$  four biological replicates. Letters indicate groups of statistically significant  
469 difference by ANOVA followed by TukeyHSD with  $p \leq 0.05$ . Scale bars in all microscopy  
470 images indicate 50  $\mu$ m and numbers represent observed leaves with necrosis per total  
471 inspected leaves.

472

473 Figure 3: Invasive *Hpas*RNAs are crucial for virulence. a) Triple STTM construct was cloned  
474 to target the three *Hpas*RNAs *Hpas*RNA2, *Hpas*RNA30 and *Hpas*RNA90 in *Arabidopsis*. b)  
475 *A. thaliana* T1 plants expressing the triple STTM to scavenge *Hpas*RNA2, *Hpas*RNA30 and  
476 *Hpas*RNA90 exhibited trailing necrosis at 7 dpi. The scale bars indicate 50  $\mu$ m and numbers  
477 represent observed leaves with necrosis per total inspected leaves. c) Number of  
478 conidiospores per gram FW was significantly reduced in two independent STTM-expressing  
479 *Arabidopsis* T2 lines (#4, #5) compared to WT. Letters indicate significant difference  
480 according to one site ANOVA including three biological replicates.

481

482 Figure 4: *Arabidopsis* target genes of *Hpas*RNAs contribute to plant defence. a) *H.*  
483 *arabidopsidis* genomic DNA content in leaves was slightly but not significantly enhanced in  
484 *atwnk2-2* and *ataed3-1* compared to WT, but not in *atwnk2-3*, at 4 dpi with  $n \geq$  four  
485 biological replicates. b) T-DNA insertion lines of *Hpas*RNA target genes *ataed3-1*, *atwnk2-2*,  
486 and *atwnk2-3* showed significantly higher number of sporangiophores per cotyledon upon  
487 infection compared to WT at 5 dpi. Asterisks indicate significant difference by one tailed  
488 Student's t-test with  $p \leq 0.05$ . c) *ataed3-1*, *atwnk2-2*, and *atwnk2-3* showed significantly

489 higher numbers of conidiospores per gram leaf FW upon infection compared to WT at 5 dpi.  
490 Letters indicate significant difference by one-site ANOVA test. d) Number of conidiospores  
491 was significantly reduced in complemented mutant lines using the native corresponding  
492 promoter (*proAtEWNK2*, *proAtAED3*) with native gene sequence, *AtAED3* and *AtWNK2*, or  
493 with target site resistant version, *AtAED3r* and *AtWNK2r* compared to the knockout mutant  
494 background expressing an empty vector (ev), respectively. Letters indicate significant  
495 difference by one-site ANOVA test.

496

#### 497 **Supplemental figure legends**

498 Figure S1: a) *Hpas*RNAs mapped to distinct coding and to non-coding genomic regions. b)  
499 Relative read counts and size distribution of *Hpas*RNAs mapped to different genomic regions  
500 at 4 and 7 dpi. c) Size distribution and first nucleotide analysis of *AtAGO1*-associated sRNAs  
501 of *A. thaliana*.

502

503 Figure S2: Stem-loop RT-PCR revealed *HpasRNA2*, *HpasRNA30* and *HpasRNA90*  
504 expression at 4 and 7 dpi in three biological replicates. Total RNA served as loading control.

505

506 Figure S3: Csy4 repressor reporter with *HpasRNA2* and *HpasRNA90* target sequence (ts) is  
507 depicted on the left and with *AtmiRNA164* ts of the *AtCUC2* target gene on the right. GUS  
508 staining of infected leaves at two magnifications revealed sequence-specific reporter silencing  
509 at 4 dpi in *HpasRNA2/HpasRNA90* ts construct but not in *AtmiRNA164* ts. Red arrows  
510 indicate *Hyaloperonospora* hyphae in the higher magnification images. Scale bars indicate 50  
511  $\mu\text{m}$ .

512

513 Figure S4: Relative expression of *AtAED3* and *AtWNK2* was measured in mock-treated or *H.*  
514 *arabidopsidis*-infected WT and *atago1-27* seedlings before and at 4 and 7 dpi by qRT-PCR

515 using *AtActin* as a reference in two independent infection experiments (a, b). Numbers below  
516 graph give change fold factors of *Hyaloperonospora*-infected versus mock-treated samples.  
517 The bar represents the average of  $n \geq$  three biological replicates. Numbers give change fold  
518 factors of *H. arabidopsidis*-infected divided by mock-treated samples, and letters indicate  
519 groups of statistically significant difference within one time point by ANOVA followed by  
520 TukeyHSD with  $p \leq 0.05$ .

521

522 Figure S5: a) Target sequence-resistant versions of *AtAED3* (*AtAED3r*) and *AtWNK2*  
523 (*AtWNK2r*) were cloned by introducing synonymous nucleotide exchanges indicated by red  
524 letters. b) RACE-PCR sequencing *AtAED3r* in *Hyaloperonospora*-infected plants, as indicated  
525 by red arrowheads, did not match with the predicted *Hpas*RNA target sequence (green box).

526

527 Figure S6: a) *H. arabidopsidis* genomic DNA content in cotyledons was lower in *atago1-27*  
528 compared to WT, as quantified by qPCR relative to plant genomic DNA at 4 dpi with  $n \geq$   
529 three biological replicates. Asterisk indicates significant difference by one tailed Student's t-  
530 test with  $p \leq 0.05$ . b) Trypan Blue-stained microscopy images of *atago1-27* cotyledons did  
531 not show any necrosis at 7 dpi. c) Trypan Blue-stained microscopy images of *atago1-45* and  
532 *atago1-46* revealed trailing necrosis at 7 dpi with *H. arabidopsidis*. d) Trypan Blue-stained  
533 microscopy images presenting *H. arabidopsidis*-infected *atago2-1* and *atago4-2* seedling  
534 leaves at 7 dpi. e) *H. arabidopsidis* genomic DNA was quantified in WT versus *atago2-1* and  
535 *atago4-2* by qPCR at 4 dpi relative to plant genomic DNA represented by  $n \geq$  four biological  
536 replicates. Letters indicate no statistical difference by ANOVA test.

537

538 Figure S7: Stem-loop RT-PCR of *Hpas*RNAs from *AtAGO1* or *AtAGO2* co-IP with mock-  
539 treated or *H. arabidopsidis*-inoculated seedlings. *AtmiRNA164* and *AtmiRNA393\** were used  
540 as positive *AtAGO* co-IP controls. Pull-down of *AtAGO1* was achieved with WT plants using

541 an *AtAGO1* native antibody, and *AtAGO2* with HA-epitope tagged *AtAGO2*-expressing *A.*  
542 *thaliana* Col-0 using anti-HA antibody with the lower panel showing Western blot analysis.

543

544 Figure S8: Trypan Blue-stained microscopy images presenting the *AtmiRNA* biogenesis  
545 mutants *athst-6*, *athen1-5* and *atse-2* did not show any trailing necrosis at 7 dpi. Scale bars in  
546 microscopy images indicate 50  $\mu\text{m}$  and numbers represent observed leaves with necrosis per  
547 total inspected leaves.

548

549 Figure S9: a) Expression analysis of *AtPRI* by RT-PCR in WT and *atago1-27* did not show  
550 obvious differences at 6 and 12 hours post inoculation with *H. arabidopsidis*. *AtActin* was  
551 used as reference gene with four biological replicates. b and c) Relative expression of *AtPRI*  
552 and *AtPDF1.2* determined by qRT-PCR using *AtActin* as reference. The bar represents the  
553 average of  $n \geq$  three biological replicates, each comprising two technical replicates.

554

555 Figure S10: a) Trypan Blue-stained microscopy images of WT or *atago1-27* leaves infected  
556 with *Erysiphe cruciferarum* did not show necrosis at 8 dpi. Scale bars in microscopy images  
557 indicate 50  $\mu\text{m}$  and numbers represent observed leaves with necrosis per total inspected  
558 leaves. b) *Erysiphe* genomic DNA content in WT and *atago1-27* was not significantly  
559 different at 4 dpi by qPCR relative to plant genomic DNA with  $n \geq$  three biological replicates  
560 as determined by one tailed Student's t-test.

561

562 Figure S11: a) Relative expression of *AtAED3* at 7 dpi and *AtWNK2* at 4 dpi was determined  
563 for STTM or empty vector (ev) expressing plants upon *H. arabidopsidis* inoculation at 7 and  
564 4 dpi respectively by qRT-PCR. One biological replicate represents three leaves, the bar  
565 represents the average of  $n \geq$  three biological replicates. b) *H. arabidopsidis* genomic DNA

566 content in leaves was increased in STTM #4 and STTM #5 plants compared to empty vector  
567 (ev) expressing WT plants at 4 dpi with  $n \geq$  three biological replicates.

568

569 Figure S12: a) T-DNA insertion of *HpasRNA* target gene mutant lines *atwnk2-2*, *atwnk2-3*  
570 and *ataed3-1* were verified by genomic DNA PCR. b) Trypan Blue-stained microscopy  
571 images revealed a higher number of haustoria in the first 200  $\mu\text{m}$  of hyphae (indicated by  
572 white bar alongside the hyphae) from the spore germination site in *atwnk2-2* compared to WT  
573 with  $n \geq$  eight leaves. Asterisk indicates significant difference by one tailed Student's t-test  
574 with  $p \leq 0.05$ . Similar results were obtained in two independent experiments.

575

576 Figure S13: Transgenic *A. thaliana atwnk2-2* was complemented with *proWNK2:WNK2* or  
577 *proWNK2:WNK2r* that resulted in a WT-like flowering time point, while empty vector (ev)  
578 exhibited early flowering phenotype, as reported for *atwnk2-2* (Wang et al., 2008).

579

580 Figure S14: a) *A. thaliana* plant expressing *AtWNK2r* in the *atwnk2-2* background revealed  
581 local necrosis without pathogen infection and b) aberrant hyphae and haustoria swellings.  
582 Scale bars in microscopy images indicate 50  $\mu\text{m}$  and the numbers represent observed leaves  
583 with necrosis or swellings respectively per total inspected leaves.

584

585 Figure S15: a) Oomycete *SRNA2* genomic loci are conserved among different plant  
586 pathogenic oomycete species of the genera *Hyaloperonospora*, *Phytophthora*, and *Pythium*  
587 (Hpa = *Hyaloperonospora arabidopsidis*, Pcap = *Phytophthora capsici*, Pso = *Phytophthora*  
588 *sojiae*, Pan = *Pythium aphanidermatum*, Pinf = *Phytophthora infestans*, Ppa = *Phytophthora*  
589 *parasitica*). Blue box at the consensus sequence indicates the region of sRNA transcription as  
590 identified by deep sequencing analysis and red box marks the consensus of the mature 21 nt  
591 *HpasRNA2* region. b) Target prediction alignment of *sRNA2* homologs from different

592 oomycete species with the target sequences of homolog *WNK2s* from respective host plant  
593 species (At = *Arabidopsis thaliana*, Gm = *Glycine max*, St = *Solanum tuberosum*, Nt =  
594 *Nicotiana tabacum*). Double point indicates a base pair match, single point is a wobble base  
595 pair, and no-point represents a mismatch.

596

## 597 **Supplemental Tables**

598 Table S1: sRNA read numbers

599 Table S2: Predicted *A. thaliana* target genes of *HpasRNAs*

600 Table S3: List of oligonucleotides used in this study

601

## 602 **Material & Methods**

### 603 **Plant material and inoculation with *H. arabidopsidis***

604 *Arabidopsis thaliana* (L.) seedlings were grown on soil under long day condition (16 h light/  
605 8 h dark, 22 °C, 60 % relative humidity). The *atago1-27*, *atago1-45*, *atago1-46*, *atago2-1*,  
606 *atago4-2*, *athst-6*, *athen1-5*, *atse-2*, *atdcl1-11*, *atdcl2dcl3dcl4*, *atrdr6-15* (all in the Col-0  
607 background) were described previously (Agorio and Vera, 2007; Allen et al., 2004; Bollman  
608 et al., 2003; Deleris et al., 2006; Grigg et al., 2005; Morel et al., 2002; Smith et al., 2009;  
609 Takeda et al., 2008; Vazquez et al., 2004; Zhang et al., 2008). The *atwnk2-2* (SALK\_121042,  
610 (Wang et al., 2008)), *atwnk2-3* (SALK\_206118) and *ataed3-1* (SAIL\_722 G02C1) lines were  
611 verified for the T-DNA insertion by PCR on genomic DNA. *Hyaloperonospora arabidopsidis*  
612 (GÄUM.) isolate Noco2 was maintained on Col-0 plants. Plant inoculation was performed  
613 using  $2-2.5 \times 10^4$  spores/ml and incubated in a growth chamber under long day condition at  
614 18 °C as described previously (Ried et al., 2019). For *atwnk2-2*, *atwnk2-3*, and *ataed3-1*  
615 pathogen assays inoculum strength was reduced to  $1 \times 10^4$  spores/ml.

616

### 617 **Powdery mildew inoculation**



618 *Erysiphe cruciferarum* was maintained on highly susceptible Col-0 *phytoalexin deficient*  
619 (*pad4*) mutants in a growth chamber at 22 °C, a 10-hour photoperiod with 150  $\mu\text{mol m}^{-2}\text{s}^{-1}$ ,  
620 and 60 % relative humidity. For pathogen assays 6-weeks old *Arabidopsis* plants were  
621 inoculated with *E. cruciferarum* in a density of 3–5 spores  $\text{mm}^{-2}$  and replaced under the same  
622 conditions.

623

#### 624 **Trypan Blue staining**

625 Infected leaves were stained with Trypan Blue as described previously (Koch and Slusarenko,  
626 1990). Microscopic images were taken with a DFC450 CCD-Camera (Leica) on a CTR 6000  
627 microscope (Leica Microsystems).

628

#### 629 **GUS staining**

630 Infected leaves were vacuum-infiltrated with GUS staining solution (0.625  $\text{mg ml}^{-1}$  X-Gluc,  
631 100 mM phosphate buffer pH 7.0, 5 mM EDTA pH 7.0, 0.5 mM  $\text{K}_3[\text{Fe}(\text{CN})_6]$ , 0.5 mM  
632  $\text{K}_4[\text{Fe}(\text{CN})_6]$ , 0.1% Triton X-100) and incubated over night at 37°C. Leaves were de-stained  
633 with 70% ethanol overnight and microscopic images were taken with the same set up as  
634 Trypan Blue stained samples.

635

#### 636 **Pathogen quantification**

637 *Hyaloperonospora* spores were harvested at 7 dpi into 2 ml of water. Spore concentration was  
638 determined using a haemocytometer (Neubauer improved, Marienfeld). Number of  
639 sporangiophores were counted on detached cotyledons using a binocular. Genomic DNA was  
640 isolated using the CTAB method followed by Chloroform extraction and isopropanol  
641 precipitation (Chen and Ronald, 1999). Four leaves were pooled for one biological replicate  
642 and isolated DNA was diluted to a concentration of 5  $\text{ng } \mu\text{l}^{-1}$ . *H. arabidopsidis* and  
643 *A. thaliana* genomic DNA were quantified by qPCR on a qPCR cycler (CFX96, Bio-Rad)

644 using SYBR Green (Invitrogen, Thermo Fischer Scientific) and GoTaq G2 Polymerase  
645 (Promega) using species-specific primers (Tab.S3). Relative DNA content was calculated  
646 using the  $2^{-\Delta\Delta C_t}$  method (Livak and Schmittgen, 2001).

647

#### 648 ***A. thaliana* gene expression analysis**

649 Total RNA was isolated using a CTAB-based method (Bemm et al., 2016). Genomic DNA  
650 was removed using DNase I (Sigma-Aldrich) treatment and cDNA synthesis was performed  
651 with 1  $\mu$ g total RNA using SuperScriptIII RT (Thermo Fisher Scientific). Gene expression  
652 was measured by qPCR on a qPCR cycler (CFX96, Bio-Rad) using SYBR Green (Invitrogen,  
653 Thermo Fisher Scientific) and GoTaq G2 Polymerase (Promega). Differential expression was  
654 calculated using the  $2^{-\Delta\Delta C_t}$  method (Livak and Schmittgen, 2001).

655

#### 656 **Generation of transgene expression vectors**

657 Plasmids for *Arabidopsis* transformation were constructed using the plant Golden Gate based  
658 toolkit (Binder et al., 2014). The coding sequences of *AtWNK2* and *AtAED3* were amplified  
659 by PCR from *Arabidopsis* cDNA, and silent mutations were introduced by PCR in the target  
660 sequence of *HpasRNA2* and *HpasRNA90*, respectively. For overexpression, *AtWNK2r* was  
661 ligated into a binary expression vector with a C-terminal YFP tag under the control of the  
662 *LjUbg1* promoter. *AtWNK2r* and *AtAED3r* were also ligated into a binary expression vector  
663 with a C-terminal YFP tag under the control of their native promoters (~2 kb upstream of the  
664 translation start site). Promoter function was tested by fusion to *2xGFP-NLS* and fluorescence  
665 microscopy of transiently transformed *Nicotiana benthamiana* leaves. STTM sequences were  
666 designed as described previously (Tang et al., 2012), and flanks with BsaI recognition sites  
667 were introduced. STTM sequences were synthesized as single stranded DNA oligonucleotides  
668 (Sigma Aldrich). The strands were end phosphorylated by T4 polynucleotide kinase (NEB),  
669 annealed, and cloned into an expression vector under the control of the *pro35S*, and the final

670 vector with STTMs for *HpasRNA2*, *HpasRNA30*, and *HpasRNA90* in a row after each other  
671 was assembled. The coding sequence of *Csy4* was synthesized (MWG Eurofins) with codon  
672 optimization for expression in plants. Cloned *Csy4* was flanked with new overhangs for  
673 integration in the Golden Gate toolkit by PCR. A fusion of the target sequences of  
674 *HpasRNA2* and *HpasRNA90*, the target sequence of *AtmiRNA164a*, and the target sequence  
675 of *Csy4* were synthesized as single strands (Sigma Aldrich). The strands were end  
676 phosphorylated by T4 polynucleotide kinase (NEB) and annealed. *Csy4* was flanked with the  
677 respective target sequences and ligated into a vector under the control of the *AtWNK2*  
678 promoter by *BsaI* cut ligation. For the reporter, a *Csy4* target sequence was inserted between  
679 the Kozak sequence and the start codon of the *GUS* gene and ligated into a vector under the  
680 control of the *AtEF1 $\alpha$*  promoter. The final binary expression vector was assembled by  
681 combination of the *Csy4* and the *GUS* vectors by *BpiI* cut ligation. All cloning primers are  
682 listed in Tab.S3.

683

#### 684 **Generation of transgenic *Arabidopsis* plants**

685 *Arabidopsis* plants of Col-0 (WT), *atwnk2-2*, and *ataed3-1* were transformed with the  
686 respective construct using the *Agrobacterium tumefaciens* strain AGL1 by the floral dip  
687 method (Clough and Bent, 1998). Transformed plants were selected on ½ MS + 1% sucrose  
688 agar plates containing 50 µg/ml kanamycin, and were subsequently transferred to soil.  
689 Experiments were carried out on T1 generation plants representing independent  
690 transformants, unless a transformation line number is indicated (e.g. STTM #4). These  
691 experiments were carried out using T2 plants.

692

#### 693 **AGO Western blot analysis and sRNA co-immunopurification**

694 *A. thaliana* AGO1 or HA-tagged *AtAGO2* were co-immunopurified (co-IPed) and isolated as  
695 described previously (Zhao et al., 2012). 1 µg  $\alpha$ -AGO1 antibody (Agrisera)/ g leaf tissue or

696 0.1  $\mu$ g  $\alpha$ -HA antibody (3F10, Roche or 12CA5)/ g leaf tissue were used. For Western blot  
697 analysis 30 % of the co-IP fraction were used, and protein was detected using  $\alpha$ -AGO1  
698 antibody (Agrisera) in 1:4000 dilution or  $\alpha$ -HA antibody (3F10, Roche or 12CA5) in 1:1000  
699 dilution, respectively. This was followed by an incubation with adequate secondary antibody  
700 ( $\alpha$ -rabbit IRdye800 (LI-COR, 1:3000 dilution),  $\alpha$ -mouse IRdye800 (LI-COR, 1:15000  
701 dilution), and  $\alpha$ -rat IRdye800 (LI-COR, 1:15000 dilution), and protein detection was  
702 performed with the Odyssey imaging system (LI-COR). Recovery of the co-IPed sRNAs was  
703 achieved as previously described (Carbonell et al., 2012), and was directly used for RT-PCR  
704 analysis or sRNA library cloning.

705

#### 706 **Stem loop RT PCR**

707 sRNAs were detected by stem-loop RT-PCR from 1  $\mu$ g of total RNA or 5 % of the *AtAGO*  
708 co-IPed RNA, as described previously (Varkonyi-Gasic et al., 2007).

709

#### 710 **5' RACE-PCR**

711 5' RACE-PCR was performed on 1  $\mu$ g of total isolated from non-inoculated or  
712 *Hyaloperonospora*-infected *Arabidopsis* leaves pooled from equal amounts isolated at 4 and 7  
713 dpi, using the 5'/3' RACE Kit, 2nd Generation (Roche Diagnostics). After the first round of  
714 PCR, a band of the expected size was cut out and a nested PCR was carried out on the eluted  
715 DNA. Bands were cut out and DNA was eluted using GeneJet Gel Extraction Kit (Thermo  
716 Scientific). PCR fragments were blunted using Klenow fragment (NEB) and cloned into  
717 pUC57 and sequenced.

718

#### 719 **sRNA cloning, sequencing and target gene prediction**

720 sRNAs were isolated for high throughput sequencing as previously described (Weiberg et al.,  
721 2013). sRNAs were cloned for Illumina sequencing using the Next® Small RNA Prep kit

722 (NEB) and sequenced on an Illumina HiSeq1500 platform. The Illumina sequencing data  
723 were analysed using the GALAXY Biostar server. Raw data were de-multiplexed (Illumina  
724 Demultiplex, Galaxy Version 1.0.0) and adapter sequences were removed (Clip adaptor  
725 sequence, Galaxy Version 1.0.0). Sequence raw data are deposited at the NCBI SRA server  
726 (BioProject accession: PRJNA395139). Reads were then mapped to a master genome of  
727 *Hyaloperonospora arabidopsidis* comprising the isolates Emoy2 (BioProject PRJNA30969),  
728 Cala2 (BioProject PRJNA297499), Noks1 (BioProject PRJNA298674) using the BOWTIE  
729 algorithm (Galaxy Version 1.1.0) allowing zero mismatches (-v 0). Subsequently, reads were  
730 cleaned from *Arabidopsis thaliana* sequences (TAIR10 release) with maximal one mismatch.  
731 For normalization, ribosomal RNA (rRNA), transfer RNA (tRNA), small nuclear RNAs  
732 (snRNAs), and small nucleolar RNA (snoRNA) reads were filtered out using the SortMeRNA  
733 program (Galaxy Version 2.1b.1). The remaining reads were count and normalized on total *H.*  
734 *arabidopsidis* reads per million (RPM). The HpasRNAs were clustered if their 5' end position  
735 or 3' end position were within the range of three nucleotides referring to the genomic loci  
736 (Weiberg et al., 2013). Target gene prediction of sRNAs was performed with the TAPIR  
737 program using a maximal score of 4.5 and a free energy ratio of 0.7 as thresholds (Bonnet et  
738 al., 2010).

739

#### 740 **DNA alignment**

741 Search for homologous sequences of *HpasRNA2* was performed by BLASTn search using  
742 the Ensembl Protists database (<http://protists.ensembl.org>). Homologs DNA sequences of 100  
743 nucleotides up- and downstream of *SRNA2* homologs were aligned using the CLC Main  
744 Workbench package.

745

#### 746 **Statistical analysis**

747 All statistical tests were carried out using R studio (version 1.0.136, rstudio.com). ANOVA  
748 tests were done on log-transformed data.

749

#### 750 **Material and method references**

751 Agorio, A., Vera, P., 2007. ARGONAUTE4 is required for resistance to *Pseudomonas*  
752 *syringae* in *Arabidopsis*. *Plant Cell* 19, 3778–3790.

753 Allen, E., Xie, Z., Gustafson, A.M., Sung, G.-H., Spatafora, J.W., Carrington, J.C., 2004.  
754 Evolution of microRNA genes by inverted duplication of target gene sequences in  
755 *Arabidopsis thaliana*. *Nat. Genet.* 36, 1282–1290.

756 Bemm, F., Becker, D., Larisch, C., Kreuzer, I., Escalante-Perez, M., Schulze, W.X.,  
757 Ankenbrand, M., Van de Weyer, A.-L., Krol, E., Al-Rasheid, K.A., Mithöfer, A.,  
758 Weber, A.P., Schultz, J., Hedrich, R., 2016. Venus flytrap carnivorous lifestyle builds  
759 on herbivore defense strategies. *Genome Res.* 26, 812–825.

760 Binder, A., Lambert, J., Morbitzer, R., Popp, C., Ott, T., Lahaye, T., Parniske, M., 2014. A  
761 modular plasmid assembly kit for multigene expression, gene silencing and silencing  
762 rescue in plants. *PLoS ONE* 9, e88218.

763 Bollman, K.M., Aukerman, M.J., Park, M.-Y., Hunter, C., Berardini, T.Z., Poethig, R.S.,  
764 2003. HASTY, the *Arabidopsis* ortholog of exportin 5/MSN5, regulates phase change  
765 and morphogenesis. *Development* 130, 1493–1504.

766 Bonnet, E., He, Y., Billiau, K., Van de Peer, Y., 2010. TAPIR, a web server for the prediction  
767 of plant microRNA targets, including target mimics. *Bioinformatics* 26, 1566–1568.

768 Carbonell, A., Fahlgren, N., Garcia-Ruiz, H., Gilbert, K.B., Montgomery, T.A., Nguyen, T.,  
769 Cuperus, J.T., Carrington, J.C., 2012. Functional analysis of three *Arabidopsis*  
770 ARGONAUTES using slicer-defective mutants. *Plant Cell* 24, 3613–

771 Chen, D.-H., Ronald, P.C., 1999. A rapid DNA miniprep method suitable for AFLP  
772 and other PCR applications. *Plant Mol. Biol. Report.* 17, 53–57.

- 773 Clough, S.J., Bent, A.F., 1998. Floral dip: a simplified method for *Agrobacterium*-mediated  
774 transformation of *Arabidopsis thaliana*. *Plant J.* 16, 735–743.
- 775 Deleris, A., Gallego-Bartolome, J., Bao, J., Kasschau, K.D., Carrington, J.C., Voinnet, O.,  
776 2006. Hierarchical action and inhibition of plant Dicer-like proteins in antiviral  
777 defense. *Science* 313, 68–71.
- 778 Grigg, S.P., Canales, C., Hay, A., Tsiantis, M., 2005. SERRATE coordinates shoot meristem  
779 function and leaf axial patterning in *Arabidopsis*. *Nature* 437, 1022–1026.
- 780 Koch, E., Slusarenko, A., 1990. *Arabidopsis* is susceptible to infection by a downy mildew  
781 fungus. *Plant Cell* 2, 437–445.
- 782 Livak, K.J., Schmittgen, T.D., 2001. Analysis of relative gene expression data using real-time  
783 quantitative PCR and the  $2^{-\Delta\Delta C_T}$  Method. *Methods* 25, 402–408.
- 784 Morel, J.-B., Godon, C., Mourrain, P., Béclin, C., Boutet, S., Feuerbach, F., Proux, F.,  
785 Vaucheret, H., 2002. Fertile hypomorphic *ARGONAUTE (ago1)* mutants impaired in  
786 post-transcriptional gene silencing and virus resistance. *Plant Cell* 14, 629–639.
- 787 Ried, M.K., Banhara, A., Hwu, F.-Y., Binder, A., Gust, A.A., Höfle, C., Hüchelhoven, R.,  
788 Nürnberger, T., Parniske, M., 2019. A set of genes involved in the accommodation of  
789 the downy mildew pathogen. *bioRxiv*. <https://doi.org/10.1101/286872>
- 790 Smith, M.R., Willmann, M.R., Wu, G., Berardini, T.Z., Moller, B., Weijers, D., Poethig, R.S.,  
791 2009. Cyclophilin 40 is required for microRNA activity in *Arabidopsis*. *Proc. Natl.*  
792 *Acad. Sci.* 106, 5424–5429.
- 793 Takeda, A., Iwasaki, S., Watanabe, T., Utsumi, M., Watanabe, Y., 2008. The mechanism  
794 selecting the guide strand from small RNA duplexes is different among Argonaute  
795 proteins. *Plant Cell Physiol.* 49, 493–500.
- 796 Tang, G., Yan, J., Gu, Y., Qiao, M., Fan, R., Mao, Y., Tang, X., 2012. Construction of short  
797 tandem target mimic (STTM) to block the functions of plant and animal microRNAs.  
798 *Methods* 58, 118–125.

- 799 Varkonyi-Gasic, E., Wu, R., Wood, M., Walton, E.F., Hellens, R.P., 2007. Protocol: a highly  
800 sensitive RT-PCR method for detection and quantification of microRNAs. *Plant*  
801 *Methods* 3, 12.
- 802 Vazquez, F., Gascioli, V., Cr  t  , P., Vaucheret, H., 2004. The nuclear dsRNA binding  
803 protein HYL1 is required for microRNA accumulation and plant development, but not  
804 post-transcriptional transgene silencing. *Curr. Biol.* 14, 346–351.
- 805 Wang, Y., Liu, K., Liao, H., Zhuang, C., Ma, H., Yan, X., 2008. The plant *WNK* gene family  
806 and regulation of flowering time in *Arabidopsis*. *Plant Biol.* 10, 548–562.
- 807 Weiberg, A., Wang, M., Lin, F.-M., Zhao, H., Zhang, Z., Kaloshian, I., Huang, H.-D., Jin, H.,  
808 2013. Fungal small RNAs suppress plant immunity by hijacking host RNA  
809 interference pathways. *Science* 342, 118–123.
- 810 Zhang, J.-F., Yuan, L.-J., Shao, Y., Du, W., Yan, D.-W., Lu, Y.-T., 2008. The disturbance of  
811 small RNA pathways enhanced abscisic acid response and multiple stress responses in  
812 *Arabidopsis*. *Plant Cell Environ.* 31, 562–574.
- 813 Zhao, H., Lii, Y., Zhu, P., Jin, H., 2012. Isolation and profiling of protein-associated small  
814 RNAs. *Methods Mol. Biol.* 883, 165–176.
- 815
- 816
- 817



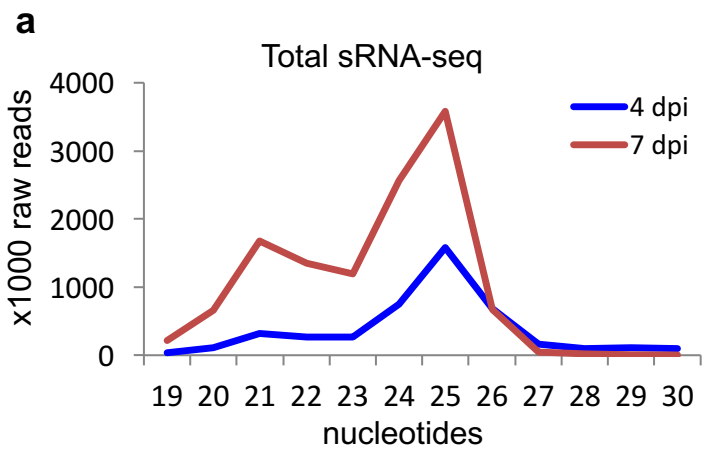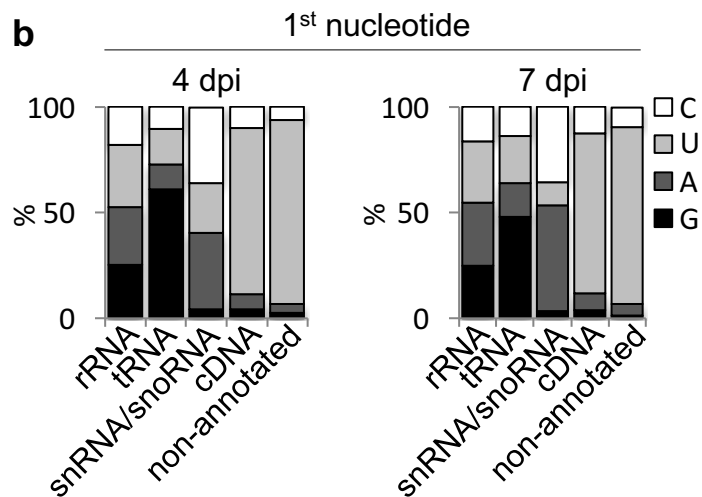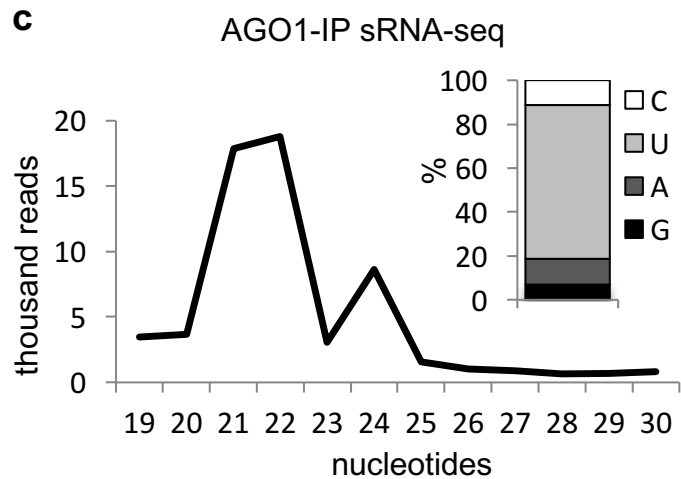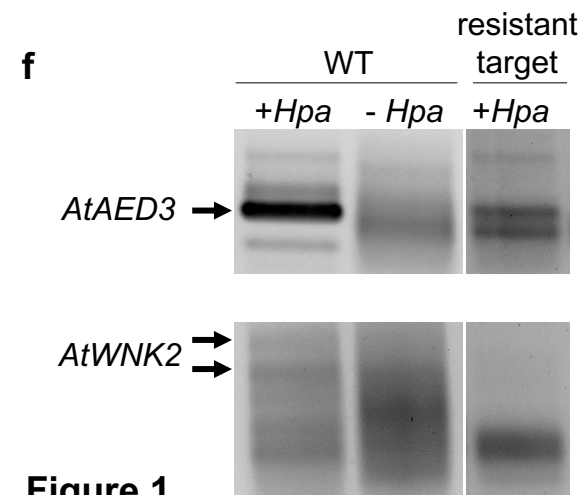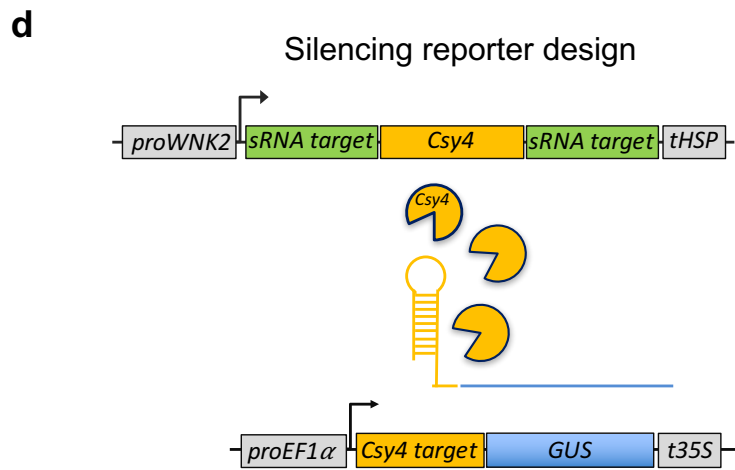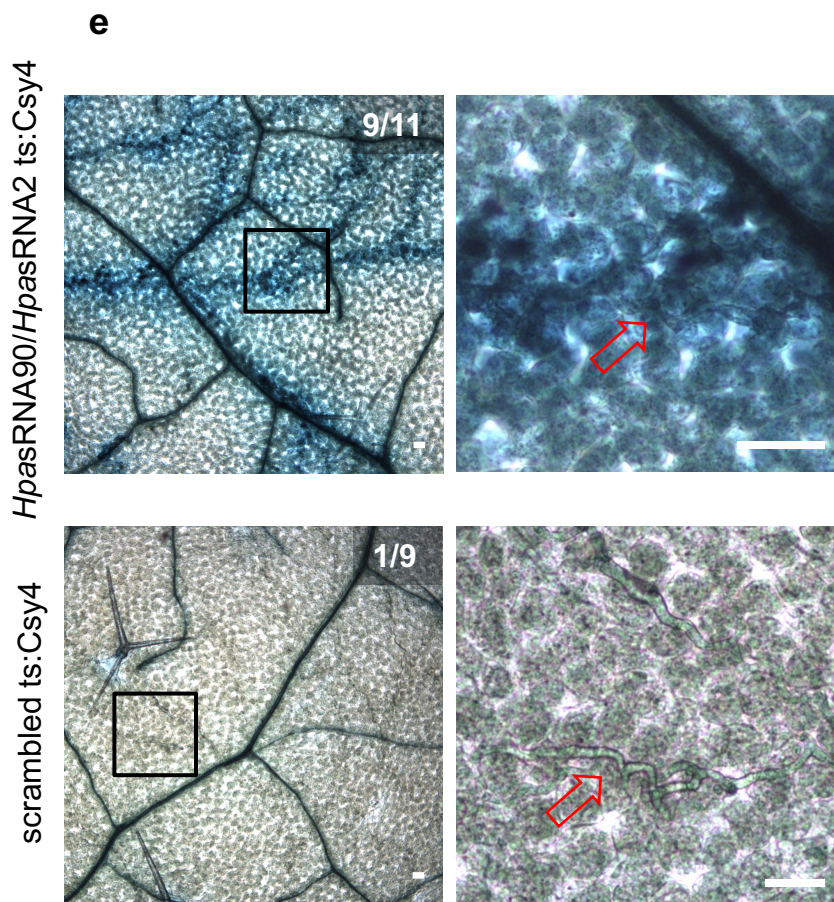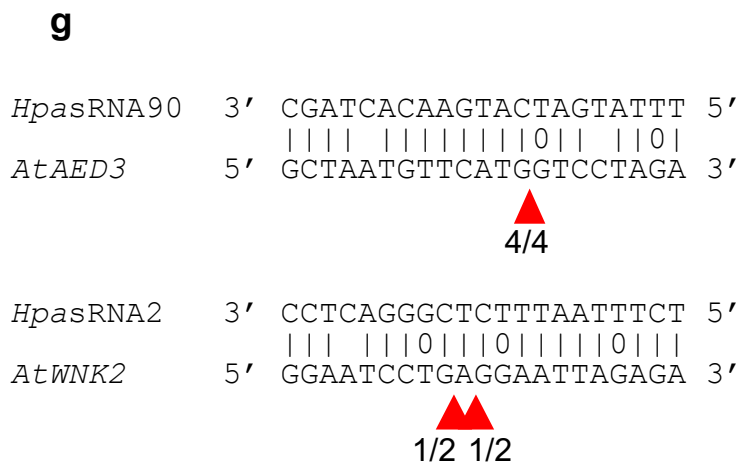

**Figure 1**

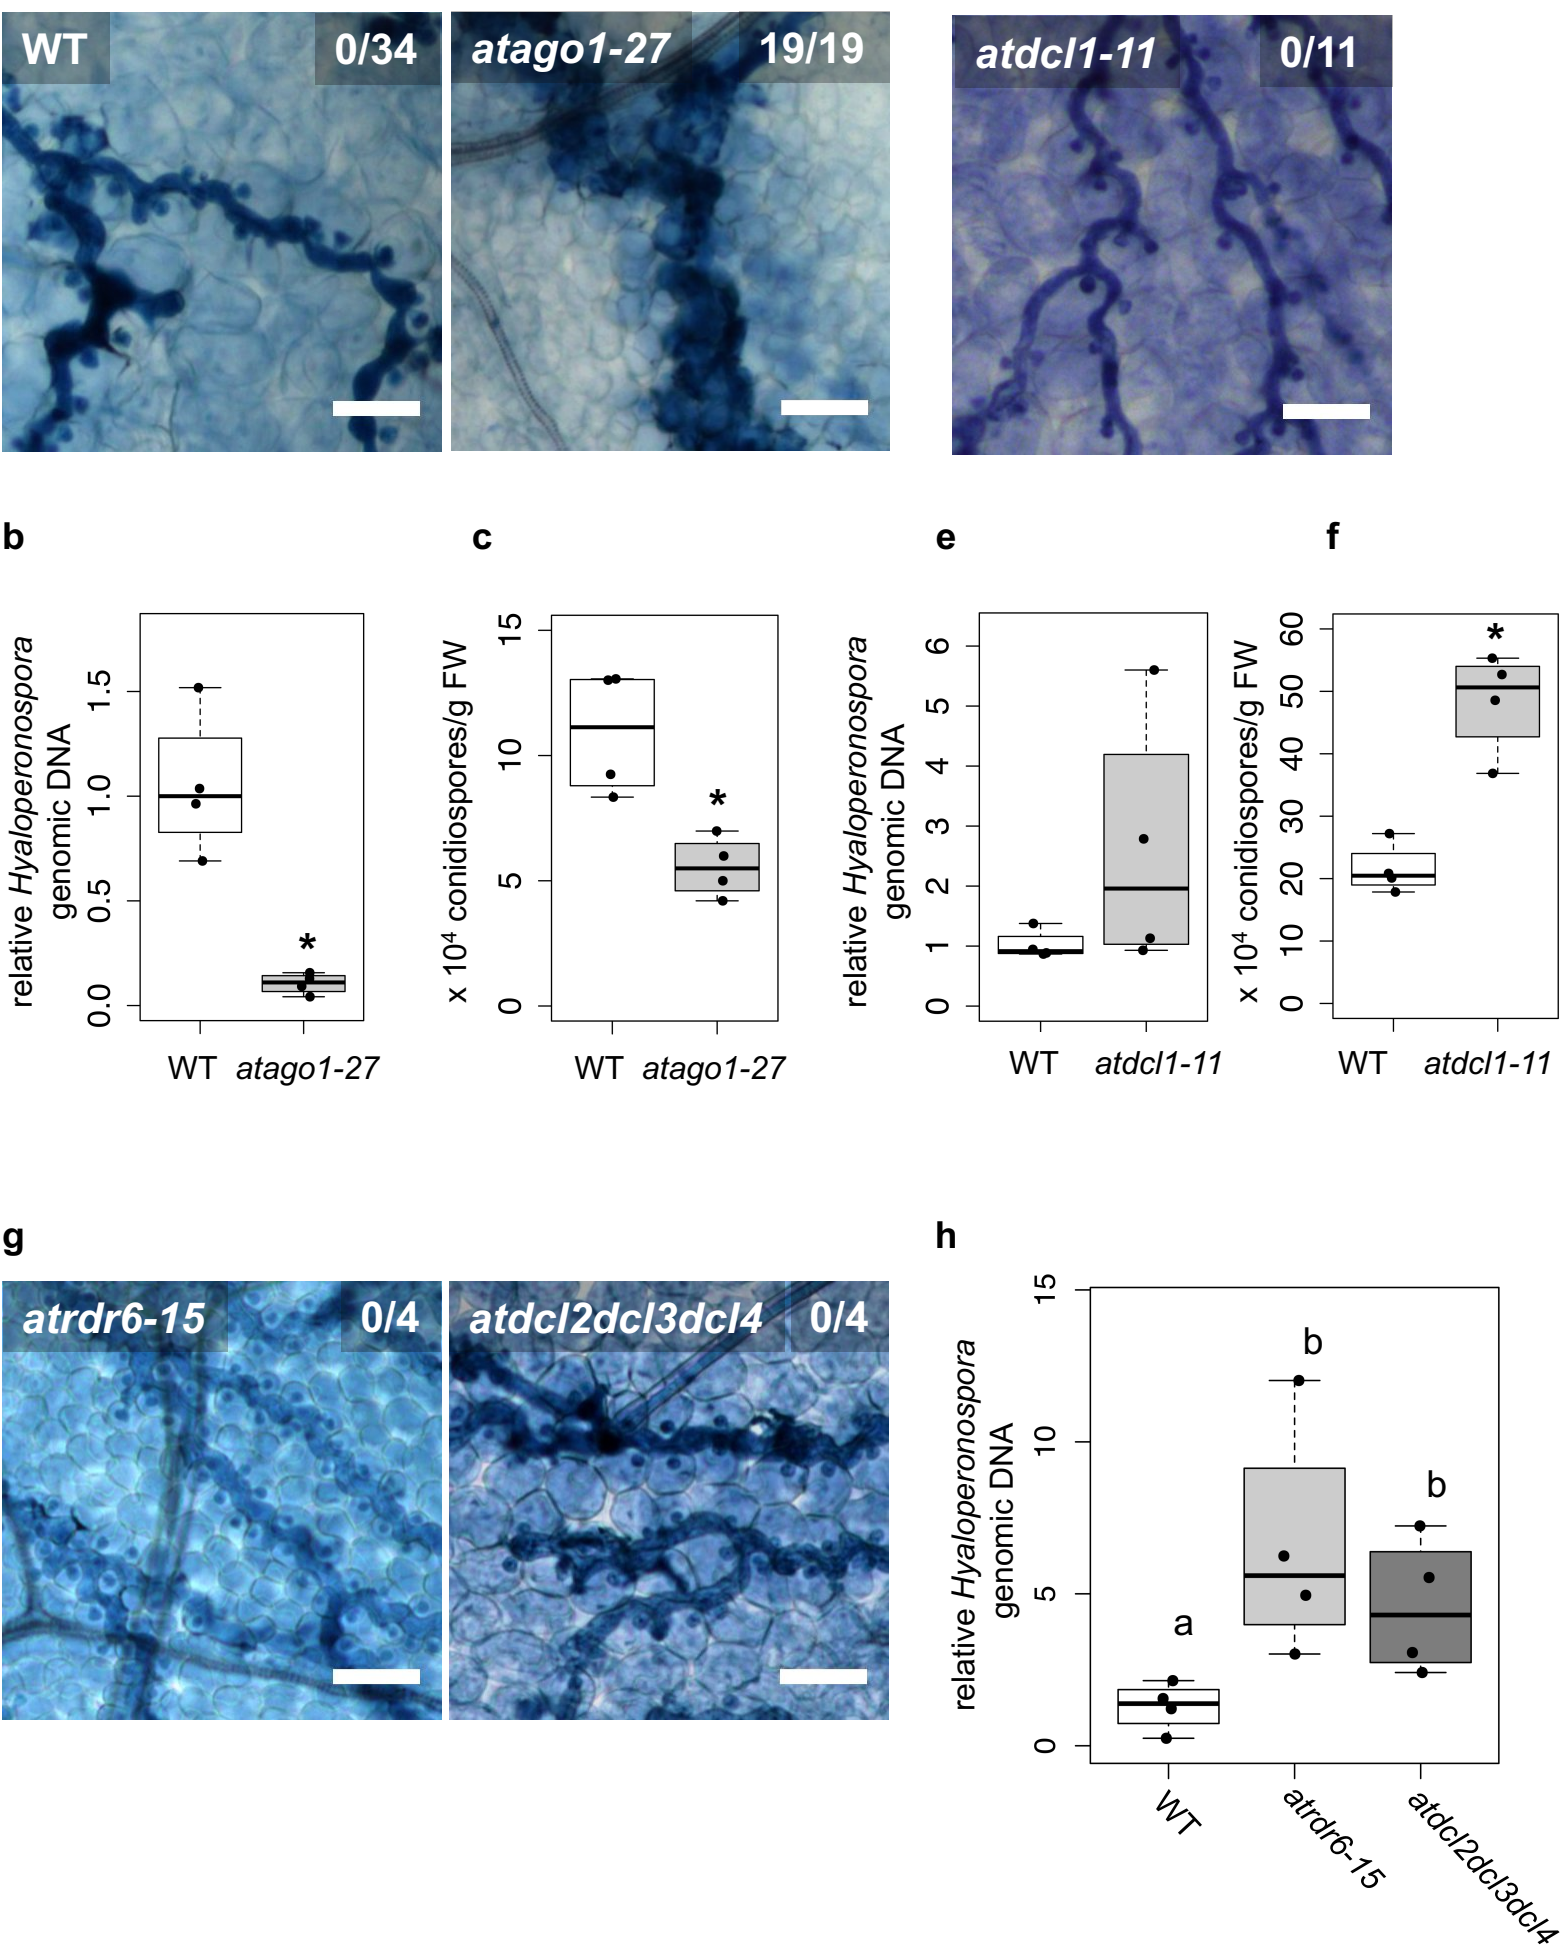

Figure 2

**a** Triple STTM

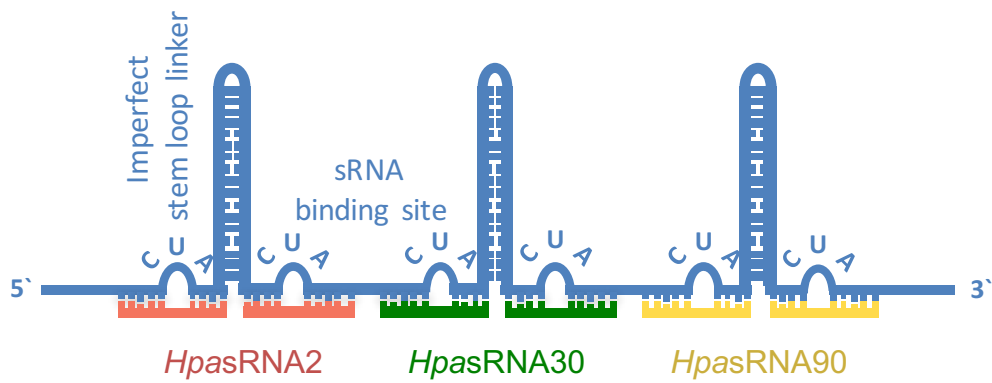

**b**

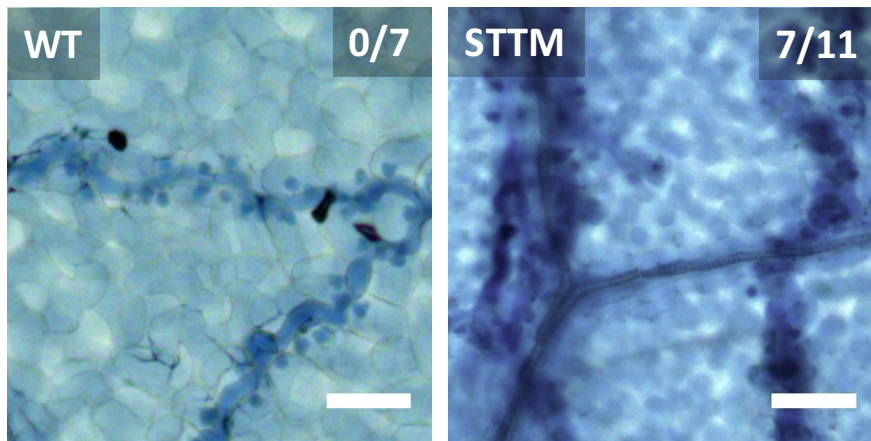

**c**

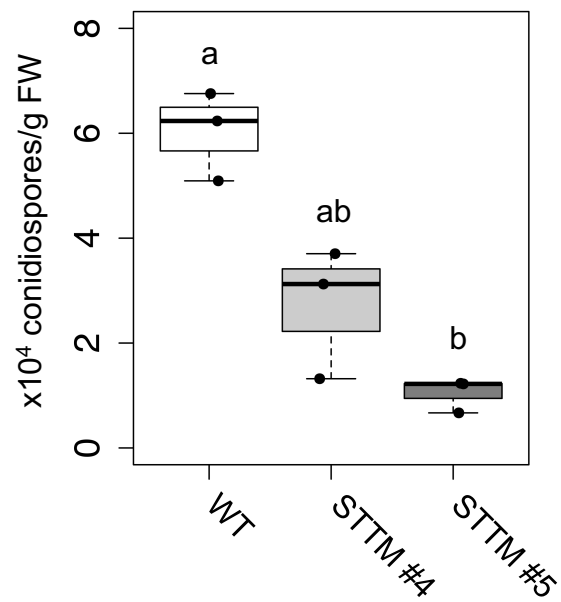

**Figure 3**

**a**

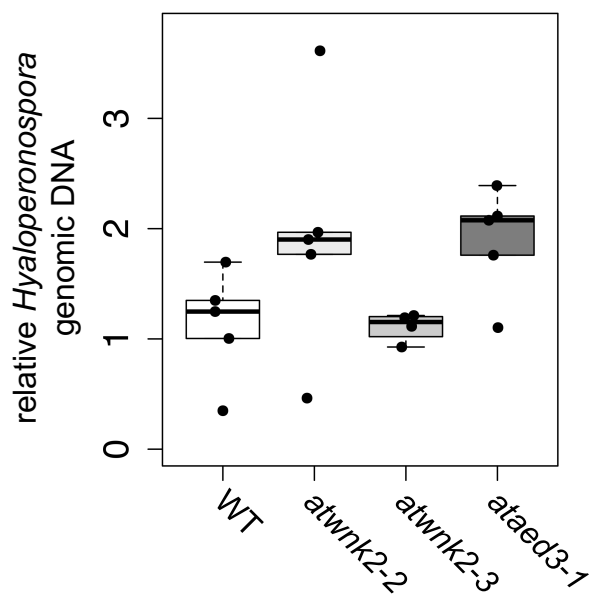

**b**

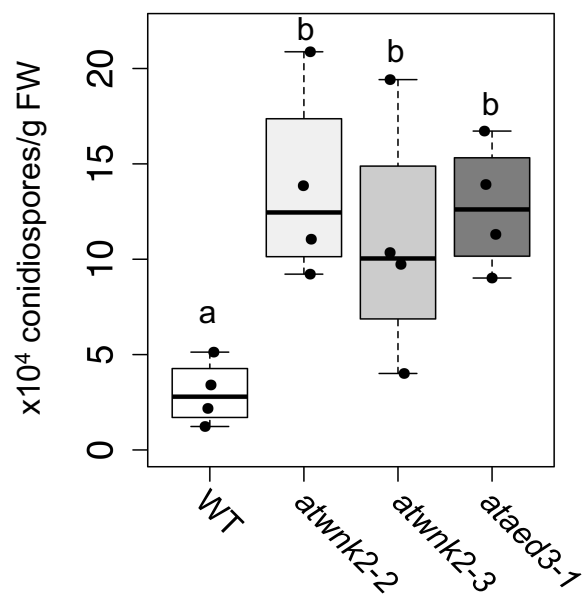

**c**

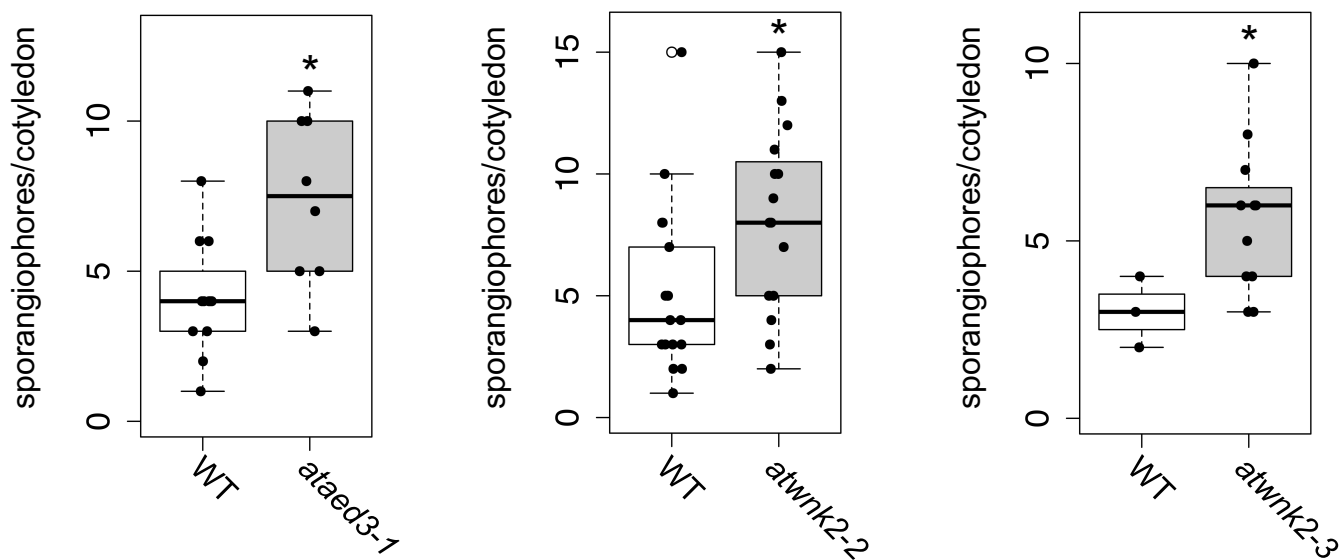

**d**

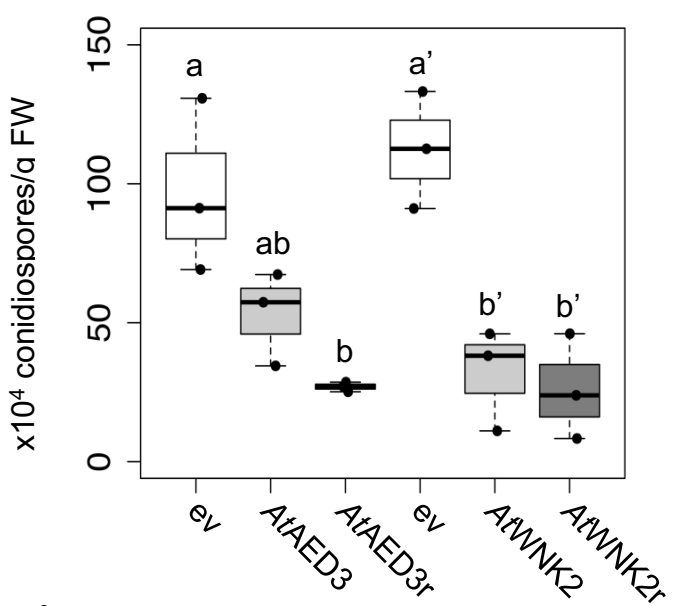

**Figure 4**
